# Supplementary material for: Refined aircraft landing-takeoff activity modeling to improve the estimation of aviation CO2 and pollutants emissions
Source: Research Square preprint supplement (doi:10.21203/rs.3.rs-6496565/v1), 2025-04-30
Supplement: Supplementary file 1 [file 9207c528501922ceea00e06b.docx]

*Supporting Information for*

**Refined aircraft landing-takeoff activity modeling to improve the estimation of aviation CO2 and pollutants emissions**

*Chaoyu Wen*1*, Jianlei Lang*1,**, Yunya Fu*1*, Zekang Yang*1*, Xiaoqing Cheng*1*, Ying Zhou*1*, Shaojun Zhang*2,3,4,**, Dongsheng Chen*1*, Shuiyuan Cheng*1

1 Key Laboratory of Beijing on Regional Air Pollution Control, College of Environmental Science and Engineering, Beijing University of Technology, Beijing, 100124, China

2 School of Environment, State Key Joint Laboratory of Environment Simulation and Pollution Control, Tsinghua University, Beijing, 100084, China

3 State Environmental Protection Key Laboratory of Sources and Control of Air Pollution Complex, Beijing, 100084, China

4 Beijing Laboratory of Environmental Frontier Technologies, School of Environment, Tsinghua University, Beijing, 100084, China

*Corresponding Authors:

**E-mail address:** **jllang@bjut.edu.cn** (Jianlei Lang); **zhsjun@tsinghua.edu.cn** (Shaojun Zhang)

#### Text S1. ALTFEM extended database usage guideline.

**(1) Applicability of Scheme 1.**

We could provide the required codes developed in MATLAB and the standardized input templates for the modelling process. Users can configure the input data according to their data availability without restrictions.

For the target airports excluded from the Airports in Mainland China in 2019, additional pre-existing work might be required to process initial flight data, match aircraft with engines, and localize emission index and fuel flow. The regional-specific ALTFEM can be constructed by inputting original modelling data following Scheme 1. The methodological framework was described in detail in the METHODS section. We would welcome the import of more advanced AMDAR, MLH and actual taxi time data to further improve the accuracy of the modelling results. And then the refined aircraft LTO emissions can be estimated using the constructed ALTFEM.

**(2) Applicability of Scheme 2 and 3.**

Considering different data foundations, we unfolded readily available databases based on different forms to provide multi-option support for users. We have provided comprehensive airport-specific monthly formulas between flight height and time and hourly formulas between taxi time and Ns in Scheme 2. Moreover, Scheme 3 provides the airport-specific daily MLH-derived climb and approach time and the hourly Ns-based taxi in and out time.

Assuming that the users can obtain the flight schedules of the target airport, Scheme 2 and 3 can be adopted. Based on the monitored or simulated MLHs and the calculated Ns data of the airport, the established formulas between flight height and time for 12 months, and the relationship between taxi in and out time and Ns for 24 hours, provided in Scheme 2, can be used to calculate the refined climb and approach, taxi in and taxi out time for each flight, respectively. Then, the emission can be calculated by the emission estimating model of ALTFEM. In the same way, the monthly MLH-derived climb and approach time and the hourly Ns-based taxi in and out time recommended in Scheme 3 could be applied directly to the emissions estimate.

The target airports were possible to determine the nearest airport based on the longitude and latitude for choosing database of climb and approach mode, as well as to select the database depending on the airports' class for taxi mode. According to the analysis, emission estimation using Scheme 2 was generally more accurate than Scheme 3. Moreover, quantitative analyses revealed that in Scenario 3, the recommended time resolution resulted in uncertainties due to 12.3% (from −31.5% to 64.6%), 8.2% (from −49.9% to 41.6%), 8.3% (from −50.2% to 43.2%), 11.1% (from −31.1% to 55.9%) and 10.9% (from −31.8% to 54.0%) for NOx, CO, HC, PM, and SO2, respectively compared to Scenario 2.

**(3) Applicability of Scheme 4.**

When the basic data are limited or an easier way of estimating emissions is needed, the Scheme 4 is suitable. A quick calculation of emissions is possible by simply entering the LTO number of the target airport. Where the resolutions of LTO numbers can be selected to match the airport-aircraft type-specific or airport-specific emission factors we provided, depending on the refinement required.

#### Text S2. Estimation of Ns-based taxi in/out time.

The functional relationship between taxi in/out time and the number of aircraft in queues (Nq) was established using Eq. (S1):

(S1)

where is the estimated taxi in/out time of aircraft (s); is the number of aircraft in queues of aircraft ; is the taxi in/out time increase per Nq (s); is the initialization taxi in/out time without any aircrafts in queue (s); is the random error; is the standard deviation of the random error.

Assuming that the number of aircraft in schedule at a given moment is , the of aircraft at this moment can be represented by Eq. (S2):

(S2)

where is the mathematical expectation of Nq when the number of aircraft in schedule is ; is the random error; is the standard deviation of the random error.

A directly proportional relationship of and with was found, as shown in Eq. (S3) and (S4):

(S3)

(S4)

where and are positive proportionality coefficients.

Therefore, when the number of aircraft in schedule at a given moment is , the functional relationship between taxi in/out time and Nq can be transformed into Eq. (S5):

(S5)

If insert Eq. (S2), we obtain Eq. (S6):

(S6)

If insert Eq. (S3), we obtain Eq. (S7):

(S7)

Let , then Eq. (S7) can be transformed into Eq. (S8):

(S8)

where

Let and , then Eq. (S8) can be transformed into Eq. (S9):

(S9)

where

#### Text S3. Using WRF simulated the actual MLH.

The Weather Research and Forecasting Model (WRF) was set up in a two-level nested grid domain based on a Lambert map projection centered at (36.5◦N, 102.5◦E). Domain 1 covered eastern Asia, with a spatial resolution of 108 × 108 km and 74 rows × 88 columns and Domain 2 covered China and surrounding regions with a spatial resolution of 36 × 36 km and 138 rows × 156 columns. The inner and outer grids of the air quality simulation are reduced inward by 5 grids on the basis of the meteorological simulation grid.

The parameter scheme of the WRF simulation can refer to our previous study 1. The meteorological initial and lateral boundary conditions were derived from the US National Centre for Environmental Prediction (NCEP FNL data) (http://rda.ucar.edu/datasets/ds083.2) with a spatial resolution of 1 × 1° (longitude–latitude) and a temporal resolution of 6 h. The model input data for terrain and land use data were obtained from the United States Geological Survey (USGS) (http://nationalmap.gov/elevation.html). The major physical parameter schemes in WRF were selected: (a) plane-boundary layer scheme using the Yonsei University scheme 2 and (b) shortwave radiation and long-wave radiation schemes using Goddard 3 and Rapid Radiative Transfer models, respectively.

Statistical metrics, including Pearson's correlation coefficient (R), normalized mean bias (NMB), and normalized mean error (NME), were used in this study to evaluate the simulation results of WRF model. The hourly statistics of R, NMB, and NME for temperature at 2m were 0.67, -1.10%, and 1.5%, respectively. For relative humidity at 2m were 0.69, 6.32%, and 21.2%, respectively. The validation results indicated that our simulation results were acceptable.

#### Table S1. Monthly aircraft LTO fuel consumption, carbon and pollutant emissions in mainland China (Gg).

|  | **HC** | **CO** | **NOx** | **PM** | **SO2** | **CO2** | **Fuel** |
| --- | --- | --- | --- | --- | --- | --- | --- |
| Jan | 0.32 | 4.14 | 4.29 | 0.08 | 1.35 | 1099.41 | 349.02 |
| Feb | 0.30 | 3.90 | 4.16 | 0.08 | 1.30 | 1058.69 | 336.09 |
| Mar | 0.30 | 4.00 | 5.00 | 0.10 | 1.52 | 1237.85 | 392.97 |
| Apr | 0.30 | 4.02 | 5.12 | 0.10 | 1.56 | 1270.42 | 403.31 |
| May | 0.32 | 4.25 | 5.63 | 0.11 | 1.71 | 1392.58 | 442.09 |
| Jun | 0.32 | 4.21 | 6.27 | 0.12 | 1.85 | 1506.59 | 478.28 |
| Jul | 0.35 | 4.67 | 6.80 | 0.13 | 2.01 | 1636.89 | 519.65 |
| Aug | 0.35 | 4.63 | 6.54 | 0.12 | 1.94 | 1579.89 | 501.55 |
| Sept | 0.32 | 4.29 | 6.09 | 0.11 | 1.80 | 1465.87 | 465.36 |
| Oct | 0.33 | 4.38 | 6.12 | 0.11 | 1.81 | 1474.02 | 467.94 |
| Nov | 0.31 | 4.09 | 5.19 | 0.10 | 1.55 | 1262.28 | 400.72 |
| Dec | 0.31 | 4.10 | 5.01 | 0.10 | 1.52 | 1237.85 | 392.97 |
| Total | 3.85 | 50.67 | 66.21 | 1.25 | 19.91 | 16214.19 | 5147.36 |

#### Table S2. The ALTFEM-recommended climb and approach time (s).

| **Month** | **Approach time (s)** | **Climb time (s)** |
| --- | --- | --- |
| **January** | 219 (±79) | 69 (±28) |
| **February** | 255 (±101) | 84 (±39) |
| **March** | 340 (±135) | 114 (±50) |
| **April** | 406 (±171) | 133 (±59) |
| **May** | 434 (±193) | 144 (±66) |
| **June** | 471 (±171) | 160 (±49) |
| **July** | 453 (±154) | 156 (±48) |
| **August** | 409 (±118) | 143 (±37) |
| **September** | 382 (±85) | 135 (±30) |
| **October** | 347 (±86) | 117 (±24) |
| **November** | 282 (±67) | 98 (±24) |
| **December** | 265 (±82) | 88 (±27) |

#### Table S3. The ALTFEM-recommended taxi in/out time for different airport classes (s).

| **Airport class** | **Taxi-in time (s)** | **Taxi-out time (s)** |
| --- | --- | --- |
| **4C** | 300 (±44) | 465 (±100) |
| **4D** | 295 (±50) | 536 (±100) |
| **4E** | 329 (±51) | 666 (±130) |
| **4F** | 446 (±74) | 847 (±139) |

#### Table S4. Comparison of aircraft types with other studies.

| **Statistics method of aircraft types** | **Aircraft types considered** | **Number of aircraft types** | **References** |
| --- | --- | --- | --- |
| Most typical combinations according to combination information from the aircraft manufacturers and the ICAO emission data bank | A300, A300-600, A319, A320, A321, A323, A330, A330-300, A340, A340-300, B737, B737-300/400, B737-700, B737-800, B757, B767, B767-300, B777, B777-200, CRJ, CRJ200, CRJ700, E190, MD-90, RJ145 | 25 | (Fan et al., 2012) 4 |
| Most typical combinations based on the synthesis of information from both aircraft manufacturers and the International Civil Aviation Organization’s Emissions Database | B738, A320, A319, B737, A321, E90, CR9, A330, B733, A333, MA60, A332, B787, ERJ, CR2, ARJ, B752, B777, B788, A350 | 20 | (She et al., 2023) 5 |
| Typical aircraft and engine combinations | A319, A320, A321, A332, A333, B737, B738, B788, B789, A350 | 10 | (Wang et al., 2023) 6 |
| Based on more than 11,000,000 records of landing-takeoff information | A300-600, A300B4, A300F-605R, A310-200, A310-300, A330-200, A330-300, A330-700, A330-900, A340-200, A340-300, A340-500, A340-600, A350-900, A350-1000, A380-800, B747-400, B747-800, B757-200, B767-200, B767-300, B767-400, B777-200, B777-300, B777F, B787-8, B787-9, B787-10, IL-76, MD11(F), A220-100, A220-300, A319-100, A320-200, A321-200, Airbus A320neo, Airbus A321neo, B717-200, B727-200, B737-200, B737-300, B737-400, B737-500, B737-600, B737-700, B737-800, B737-900, B737MAX8, BAE-100300, BAE-300, ERJ-195, FokkerF100, IL-62, MD-81, MD-82, MD-83, MD-87, MD-88, MD-90, TU204-120C, TU-154M, YAK-42, AN-148, AN-158, AN-74TK-200, ARJ21-700, ATR 42, ATR 72, BAE 146, CRJ-100, CRJ-200, CRJ-700, CRJ-900, DHC-8-100, DHC-8-300, Do-328(JET), Douglas DC-8-60, Douglas DC-8-70, ERJ-135, ERJ-145, ERJ-170, ERJ-190, EMB-145, ERJ170-100, ERJ170-500, FokkerF50, FokkerF70, McDonnell Douglas DC-10-30, McDonnell Douglas DC-9-30, MA60 | 90 | This Study |

#### Figure S1. Taxi in/out time calculating model for PVG Airport.

#### Figure S2. (a) The correlation of and with annual average hourly aircraft number (N) during taxi out at PVG Airport. (b)The correlation of and with N during taxi in/out for CGO Airport, WUH Airport, CSX Airport, HAK Airport and NNG Airport. (c)The correlation of and with N during taxi in and taxi out for 237 airports in mainland China.

#### Figure S3. Comparison of ALTFEM-MLHs and ICAO default MLHs, and the correlation between MLH-derived climb and approach time and MLHs at PEK Airport and CAN Airport.

#### Figure S4. (a) Annual average hourly emissions and the LTO number of domestic civil flights in China in 2019. (b) Contribution of different operating modes on fuel consumption, carbon and pollutants emission during LTO. (c) Contribution of different aircraft types on fuel consumption, carbon and pollutants emission during LTO. (d) Spatial distribution of NOx emissions (Mg) from 237 airports in China in 2019.

#### Figure S5. Methodological framework for estimating Mitigation Potential index and identifying fuel and emission reduction potentials during taxi of 237 airports.

#### Figure S6. (a) Spatial distribution of airport-specific yearly average emission factors (kg/LTO) of NOx. (b) At PEK airport, monthly and hourly variation of unit LTO-based NOx emission factors and fuel consumption (kg/LTO), and a comparison with National Guideline. (c) Relationship between unit LTO-based NOx emission factors and fuel consumption (kg/LTO) and LTO number in January and August.

#### Figure S7. (a) Using the actual taxi time validated the Ns-based taxi in and out time (Taking PEK Airport at 12:00 as an example). (b) Using the actual flight height and time from AMDAR validated the MLH-derived climb and approach time (Taking PEK Airport in January as an example). (c) Uncertainty analysis of CO and NOx emission for each aircraft under 95% prediction interval at PEK Airport (taking 100 aircrafts as an example)

#### Figure S8. Relationship between actual taxi in/out time and Nq at Shanghai Pudong International Airport (PVG).

#### Figure S9. (a) Attempts at correlation analysis between the average daily taxi time and aircraft, taking PEK Airport as an example. (b) The coefficient of variation analysis for parameters ( and ) at different temporal resolutions of taxi in and out time calculating model at PEK and (c) Shanghai Pudong International Airport (PVG).

#### Figure S10. Methodology schematic for calculating Ns and Ns-based taxi in/out time based on Nq.

#### Figure S11. Clustering relationship between constant and airport classes for (a) taxi in and (b) taxi out time (The numbers labelled with the same color as the box plots represent the average values for different classes).

#### Figure S12. Hourly coefficient of determination (R2) of taxi in and out time calculating model for 237 airports.

#### Figure S13. Hourly taxi in and out time and the comparison between ALTFEM, actual, and ICAO taxi in/out time based on statistics of mean absolute error (MAE) and mean absolute percentage error (MAPE) for SHA Airport, PEK Airport and PVG Airport.

#### Figure S14. (a) Domain of the WRF model and the locations of airports in mainland China. (b) Comparative validation of simulated MLH based on the observed MLH for PEK Airport, CAN Airport and PVG Airport.

MB=

NMB=

# References

1. Wen, C. *et al.* Emission and influences of non-road mobile sources on air quality in China, 2000-2019. *Environ. Pollut.* **324**, 121404 (2023).
2. Hong, S. Y., Noh, Y. & Dudhia, J. A new vertical diffusion package with an explicit treatment of entrainment processes. *Monthly Weather Review* **134**, 2318-2341 (2006).
3. Mlawer, E. J., Taubman, S. J., Brown, P. D., Iacono, M. J. & Clough, S. A. Radiative transfer for inhomogeneous atmospheres: RRTM, a validated correlated-k model for the longwave. *Journal of Geophysical Research: Atmospheres* **102**, 16663-16682 (1997).
4. Fan, W., Sun, Y., Zhu, T. & Wen, Y. Emissions of HC, CO, NOx, CO2, and SO2 from civil aviation in China in 2010. *Atmos. Environ.* **56**, 52-57 (2012).
5. She, Y., Deng, Y. & Chen, M. From Takeoff to Touchdown: A Decade’s Review of Carbon Emissions from Civil Aviation in China’s Expanding Megacities. *Sustainability* **15**, 16558 (2023).
6. Wang, Y. *et al.* Emissions from international airport and its impact on air quality: A case study of beijing daxing international airport (PKX), China. *Environ. Pollut.* **336**, 122472 (2023).
